# Supplementary material for: Influence of Two Widely Used Solvents, Ethanol and Dimethyl Sulfoxide, on Human Sperm Parameters
Source: Int J Mol Sci. 2022 Dec 28;24(1):505. doi: 10.3390/ijms24010505 (PMC9820180; doi:10.3390/ijms24010505)
Supplement: Supplementary file 1 [file ijms-24-00505-s001.zip › Table S1.xlsx]

## Sheet: acrosome integrity_DMSO
donor	concentration (%)	acrosome-intact sperm	total
9	0	187	200
7	0	184	200
8	0	189	200
6	0	191	200
9	0.1	190	200
7	0.1	184	200
8	0.1	187	200
6	0.1	190	200
9	0.5	187	200
7	0.5	190	209
8	0.5	182	200
6	0.5	183	200
9	1	189	200
7	1	181	200
8	1	183	200
6	1	185	200
9	2	189	200
7	2	173	200
8	2	168	200
6	2	185	200

## Sheet: capacitation_DMSO
donor	concentration (%)	relative phosphotyrosine content
1	0	1.2521
2	0	1.5517
3	0	1.38802
4	0	1.4977
5	0	1.00755
1	0.1	1.03782
2	0.1	0.988217
3	0.1	0.964896
4	0.1	0.937761
5	0.1	0.505001
1	0.5	0.464395
2	0.5	0.973606
3	0.5	0.796668
4	0.5	0.796345
5	0.5	0.858685
1	1	0.518344
2	1	1.06427
3	1	0.77977
4	1	1.1564
5	1	0.747543
1	2	0.626316
2	2	0.81967
3	2	0.858943
4	2	1.09592
5	2	0.623549

## Sheet: progressive motility_DMSO
donor	concentration (%)	progressive sperm	total
5	0	124	152
1	0	205	301
2	0	68	150
3	0	83	123
4	0	70	113
7	0	83	116
6	0	58	77
8	0	110	137
5	0.1	76	92
1	0.1	163	259
2	0.1	79	133
3	0.1	84	126
4	0.1	92	135
7	0.1	63	91
6	0.1	43	58
8	0.1	103	146
5	0.5	113	140
1	0.5	249	291
2	0.5	91	152
3	0.5	110	145
4	0.5	74	111
7	0.5	75	108
6	0.5	33	54
8	0.5	71	102
5	1	70	96
1	1	141	225
2	1	72	150
3	1	114	154
4	1	53	83
7	1	60	82
6	1	53	71
8	1	82	113
5	2	52	85
1	2	102	175
2	2	62	156
3	2	99	153
4	2	46	92
7	2	69	93
6	2	48	67
8	2	89	141

## Sheet: total motility_DMSO
donor	concentration (%)	motile sperm	total
5	0	127	152
1	0	236	301
2	0	92	150
3	0	100	123
4	0	83	113
7	0	91	116
6	0	62	77
8	0	121	137
5	0.1	79	92
1	0.1	177	259
2	0.1	86	133
3	0.1	92	126
4	0.1	113	135
7	0.1	69	91
6	0.1	48	58
8	0.1	121	146
5	0.5	120	140
1	0.5	260	291
2	0.5	102	152
3	0.5	119	145
4	0.5	94	111
7	0.5	89	108
6	0.5	41	54
8	0.5	91	102
5	1	77	96
1	1	163	225
2	1	85	150
3	1	123	154
4	1	67	83
7	1	69	82
6	1	59	71
8	1	91	113
5	2	56	85
1	2	118	175
2	2	82	156
3	2	119	153
4	2	64	92
7	2	73	93
6	2	55	67
8	2	112	141

## Sheet: vitality_DMSO
donor	concentration (%)	live sperm	total
1	0	282	300
2	0	286	300
3	0	285	300
4	0	289	300
5	0	272	300
1	0.1	278	300
2	0.1	289	300
3	0.1	283	300
4	0.1	290	300
5	0.1	277	300
1	0.5	282	300
2	0.5	285	300
3	0.5	288	300
4	0.5	295	300
5	0.5	270	300
1	1	276	300
2	1	279	300
3	1	286	300
4	1	280	300
5	1	279	300
1	2	267	300
2	2	277	300
3	2	281	300
4	2	283	300
5	2	265	300

## Sheet: acrosome integrity_EtOH
donor	concentration (%)	acrosome-intact sperm	total
9	0	187	200
7	0	184	200
8	0	189	200
6	0	191	200
9	0.1	187	200
7	0.1	183	200
8	0.1	183	200
6	0.1	192	200
9	0.5	213	228
7	0.5	185	205
8	0.5	184	201
6	0.5	188	200
9	1	188	200
7	1	183	202
8	1	186	205
6	1	189	200
9	2	190	200
7	2	174	200
8	2	180	200
6	2	187	200

## Sheet: capacitation_EtOH
donor	concentration (%)	relative phosphotyrosine content
1	0	1.2521
2	0	0.704261
3	0	1.56556
4	0	1.4977
5	0	1.00755
1	0.1	0.765486
2	0.1	1.28174
3	0.1	1.01559
4	0.1	0.8993
5	0.1	1.52975
1	0.5	1.24474
2	0.5	0.982254
3	0.5	0.805834
4	0.5	1.07753
5	0.5	1.28285
1	1	0.832368
2	1	0.952983
3	1	0.704776
4	1	1.01373
5	1	1.06548
1	2	0.875587
2	2	0.242385
3	2	1.12765
4	2	1.0914
5	2	1.07646

## Sheet: progressive motility_EtOH
donor	concentration (%)	progressive sperm	total
5	0	124	152
1	0	205	301
2	0	68	150
3	0	83	123
4	0	70	113
7	0	83	116
6	0	58	77
8	0	110	137
5	0.1	80	114
1	0.1	211	301
2	0.1	51	111
3	0.1	79	117
4	0.1	88	123
7	0.1	46	71
6	0.1	65	79
8	0.1	71	98
5	0.5	44	84
1	0.5	105	154
2	0.5	47	131
3	0.5	118	162
4	0.5	55	87
7	0.5	62	87
6	0.5	59	72
8	0.5	83	122
5	1	73	103
1	1	97	196
2	1	36	95
3	1	129	187
4	1	49	136
7	1	46	72
6	1	50	67
8	1	111	157
5	2	87	120
1	2	159	269
2	2	34	125
3	2	43	92
4	2	62	117
7	2	45	82
6	2	30	66
8	2	76	122

## Sheet: total motility_EtOH
donor	concentration (%)	motile sperm	total
5	0	127	152
1	0	236	301
2	0	92	150
3	0	100	123
4	0	83	113
7	0	91	116
6	0	62	77
8	0	121	137
5	0.1	82	114
1	0.1	238	301
2	0.1	60	111
3	0.1	91	117
4	0.1	104	123
7	0.1	51	71
6	0.1	65	79
8	0.1	80	98
5	0.5	55	84
1	0.5	115	154
2	0.5	63	131
3	0.5	132	162
4	0.5	65	87
7	0.5	70	87
6	0.5	63	72
8	0.5	100	122
5	1	80	103
1	1	105	196
2	1	46	95
3	1	145	187
4	1	93	136
7	1	53	72
6	1	57	67
8	1	126	157
5	2	98	120
1	2	182	269
2	2	50	125
3	2	52	92
4	2	78	117
7	2	59	82
6	2	39	66
8	2	98	122

## Sheet: vitality_EtOH
donor	concentration (%)	live sperm	total
1	0	282	300
2	0	286	300
3	0	285	300
4	0	289	300
5	0	272	300
1	0.1	280	300
2	0.1	283	300
3	0.1	288	300
4	0.1	291	300
5	0.1	273	300
1	0.5	277	300
2	0.5	260	300
3	0.5	289	300
4	0.5	292	300
5	0.5	274	300
1	1	279	300
2	1	284	300
3	1	283	300
4	1	279	300
5	1	279	300
1	2	274	300
2	2	276	300
3	2	282	300
4	2	295	300
5	2	280	300
