# Supplementary material for: Influence of Two Widely Used Solvents, Ethanol and Dimethyl Sulfoxide, on Human Sperm Parameters
Source: Int J Mol Sci. 2022 Dec 28;24(1):505. doi: 10.3390/ijms24010505 (PMC9820180; doi:10.3390/ijms24010505)
Supplement: Supplementary file 1 [file ijms-24-00505-s001.zip › Table S2.xlsx]

## Sheet: total motility_control
donor	time (h)	motile sperm	total
9	0	59	80
7	0	79	87
6	0	47	57
8	0	124	142
9	0.5	133	141
7	0.5	52	65
6	0.5	65	75
8	0.5	127	150
9	2	69	84
7	2	81	93
6	2	70	82
8	2	88	103
9	4	98	121
7	4	91	116
6	4	62	77
8	4	121	137

## Sheet: progressive motility_control
donor	time (h)	progressive sperm	total
9	0	51	80
7	0	71	87
6	0	44	57
8	0	114	142
9	0.5	130	141
7	0.5	43	65
6	0.5	51	75
8	0.5	113	150
9	2	63	84
7	2	75	93
6	2	58	82
8	2	79	103
9	4	90	121
7	4	83	116
6	4	58	77
8	4	110	137

## Sheet: total motility_1%EtOH
donor	time (h)	motile sperm	total
9	0	85	109
7	0	55	76
6	0	59	73
8	0	89	108
9	0.5	99	128
7	0.5	55	77
6	0.5	36	51
8	0.5	80	101
9	2	90	112
7	2	129	147
6	2	44	55
8	2	151	174
9	4	70	90
7	4	53	72
6	4	57	67
8	4	126	157

## Sheet: progressive motility_1%EtOH
donor	time (h)	progressive sperm	total
9	0	74	109
7	0	53	76
6	0	54	73
8	0	75	108
9	0.5	91	128
7	0.5	47	77
6	0.5	31	51
8	0.5	68	101
9	2	79	112
7	2	119	147
6	2	38	55
8	2	127	174
9	4	58	90
7	4	46	72
6	4	50	67
8	4	111	157

## Sheet: total motility_2%EtOH
donor	time (h)	motile sperm	total
9	0	174	201
7	0	46	67
6	0	40	61
8	0	77	113
9	0.5	137	152
7	0.5	51	74
6	0.5	29	47
8	0.5	92	123
9	2	81	107
7	2	63	82
6	2	79	100
8	2	130	150
9	4	85	117
7	4	59	82
6	4	39	66
8	4	98	122

## Sheet: progressive motility_2%EtOH
donor	time (h)	progressive sperm	total
9	0	167	201
7	0	36	67
6	0	35	61
8	0	64	113
9	0.5	129	152
7	0.5	47	74
6	0.5	18	47
8	0.5	74	123
9	2	74	107
7	2	52	82
6	2	59	100
8	2	105	150
9	4	68	117
7	4	45	82
6	4	30	66
8	4	76	122

## Sheet: total motility_2%DMSO
donor	time (h)	motile sperm	total
9	0	118	133
7	0	43	51
6	0	68	81
8	0	106	124
9	0.5	105	125
7	0.5	59	73
6	0.5	114	124
8	0.5	117	126
9	2	97	113
7	2	62	81
6	2	51	60
8	2	117	143
9	4	90	111
7	4	73	93
6	4	55	67
8	4	112	141

## Sheet: progressive motility_2%DMSO
donor	time (h)	progressive sperm	total
9	0	105	133
7	0	40	51
6	0	65	81
8	0	100	124
9	0.5	95	125
7	0.5	48	73
6	0.5	101	124
8	0.5	102	126
9	2	89	113
7	2	55	81
6	2	47	60
8	2	91	143
9	4	83	111
7	4	69	93
6	4	48	67
8	4	89	141
